# Supplementary material for: Exome-wide association study of treatment-resistant depression suggests novel treatment targets
Source: PubMed Central journal article supplement (PMC10394052; doi:10.1038/s41598-023-38984-z), 2023-08-01

Supplementary Figure 1

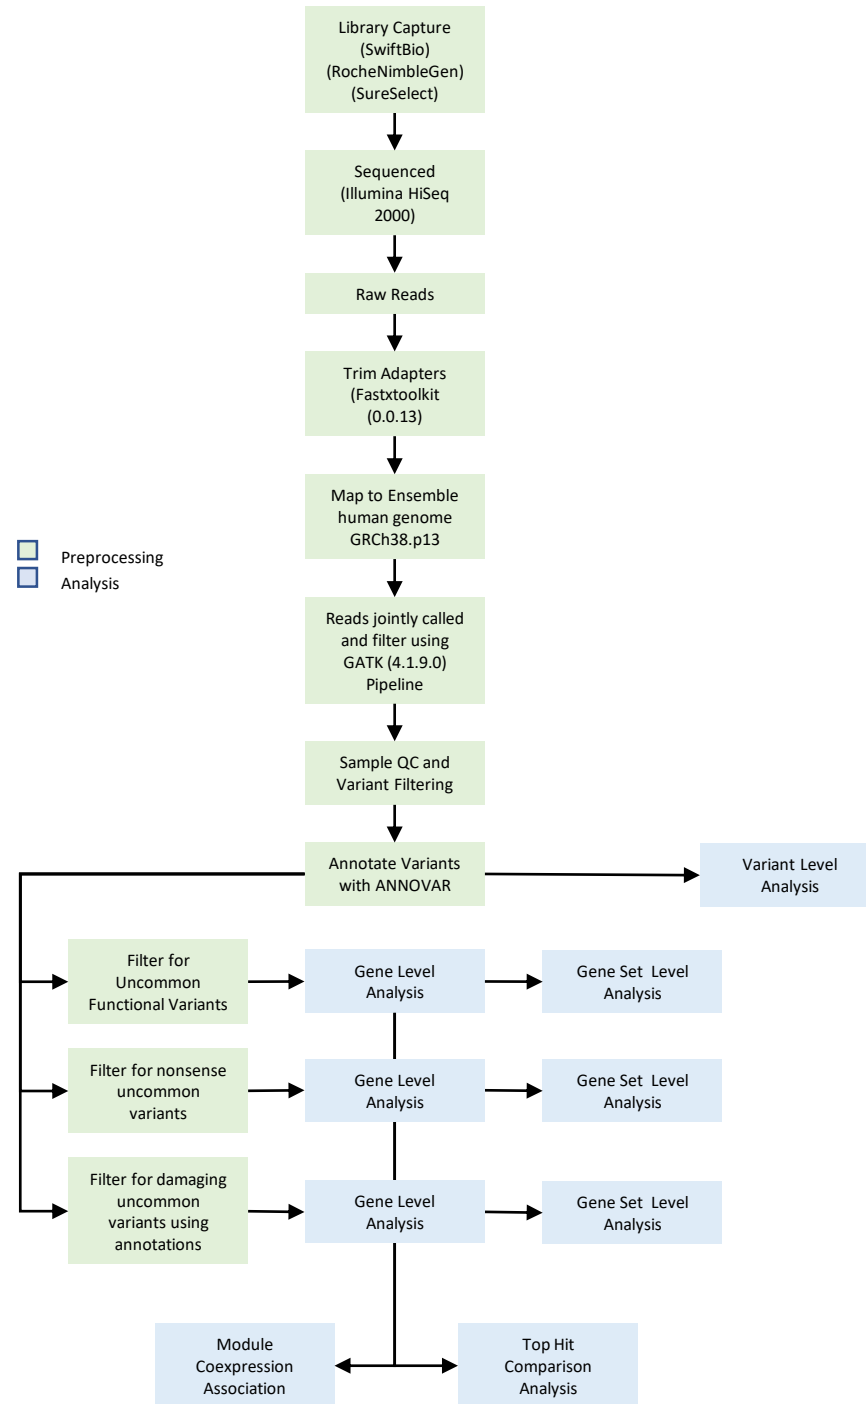

Supplementary Figure 2

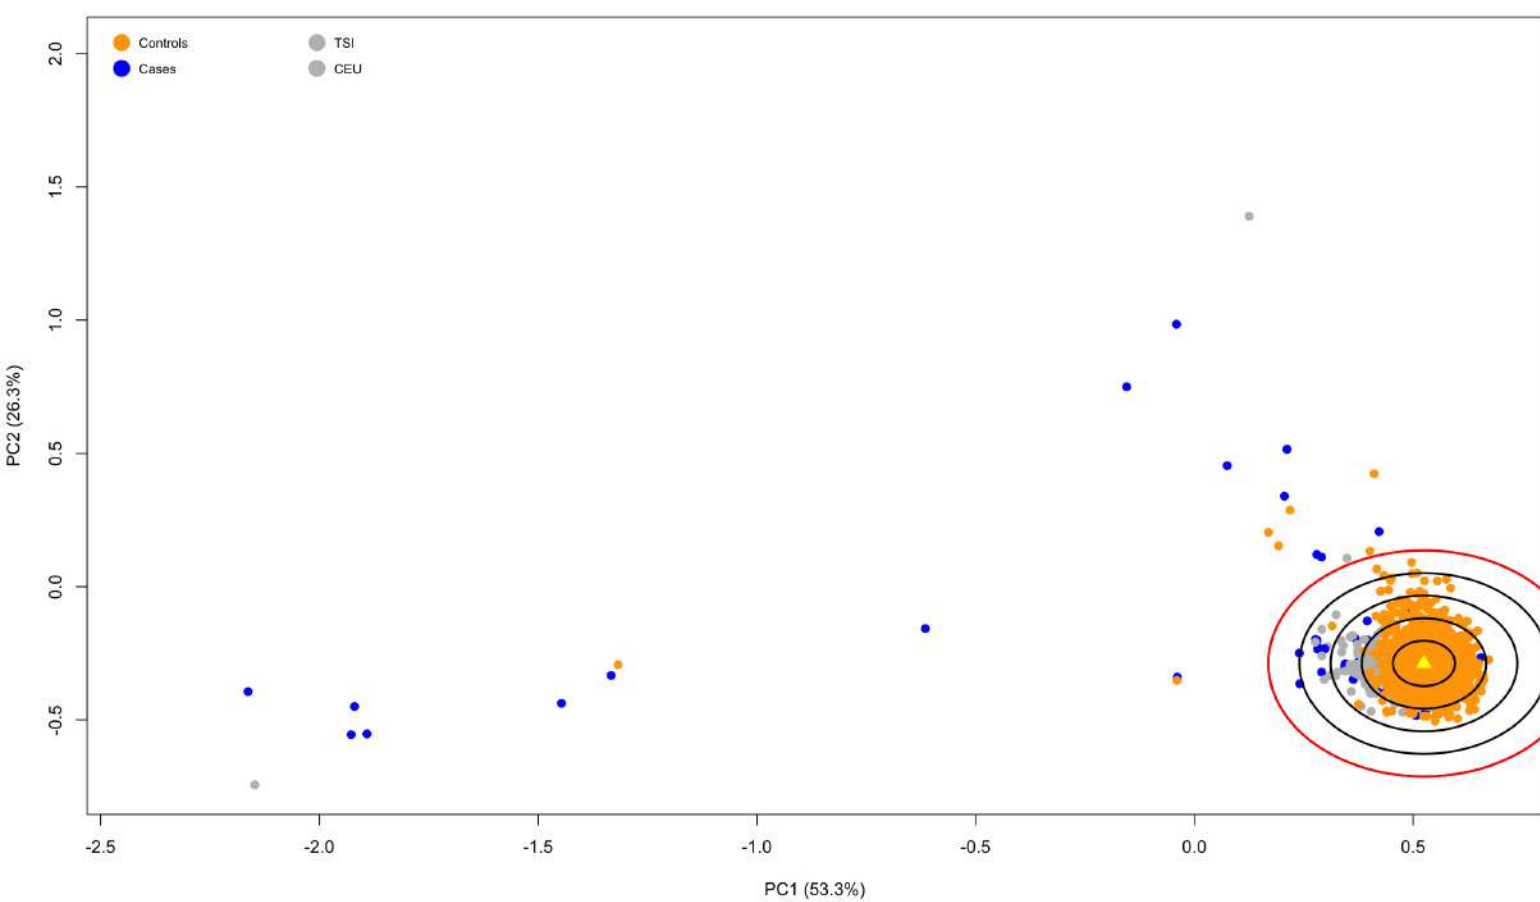

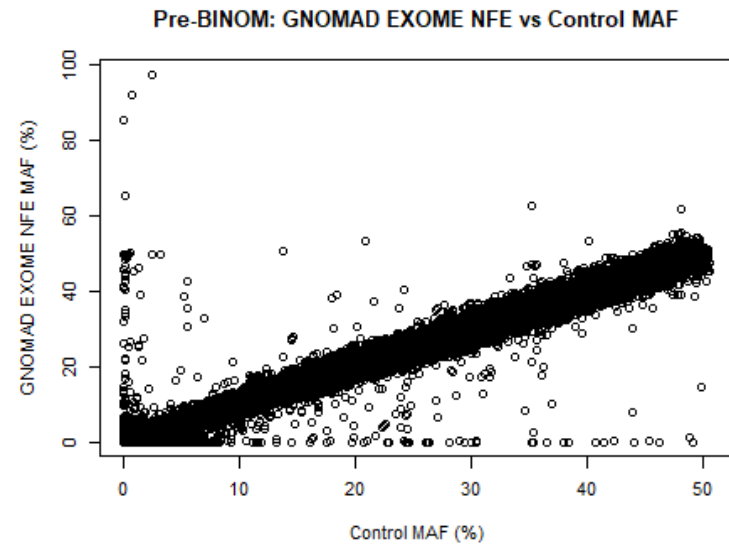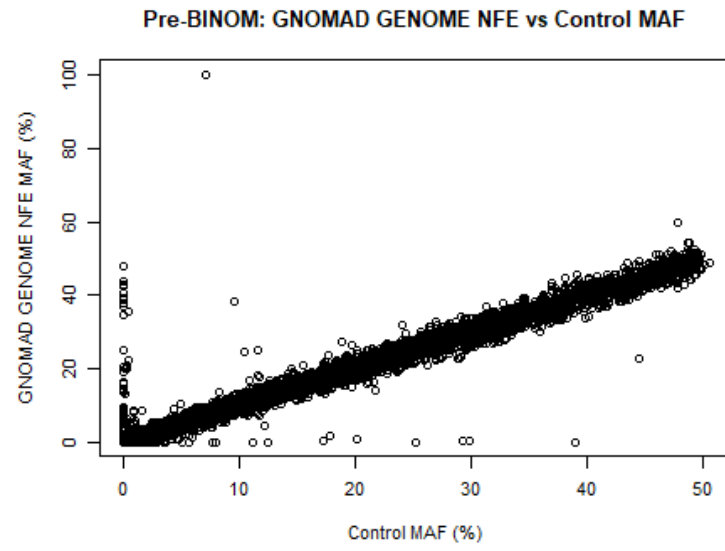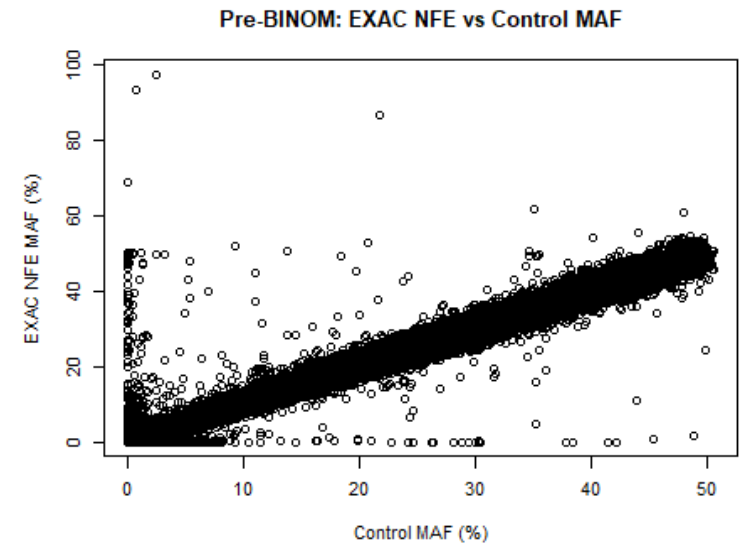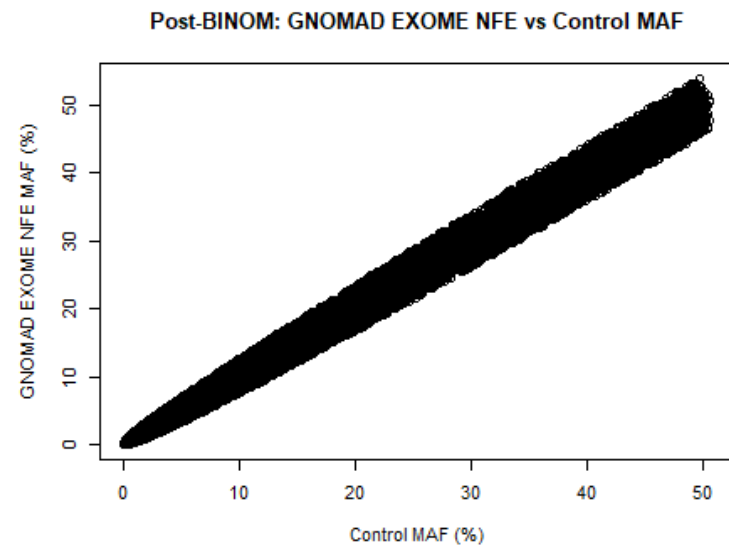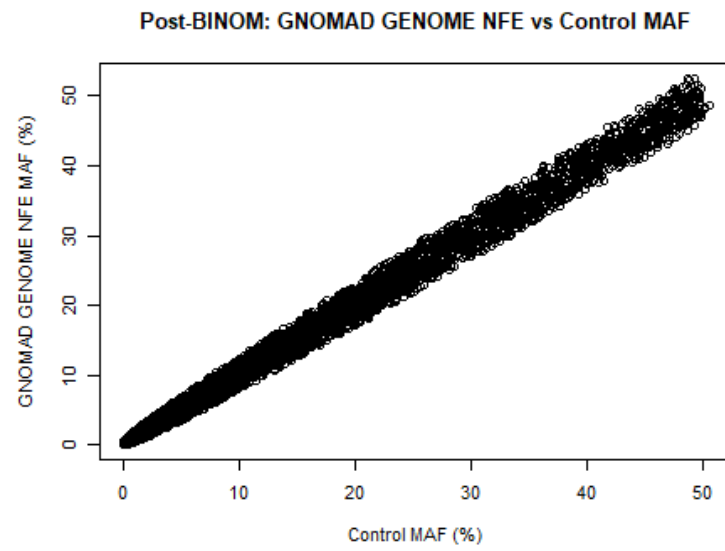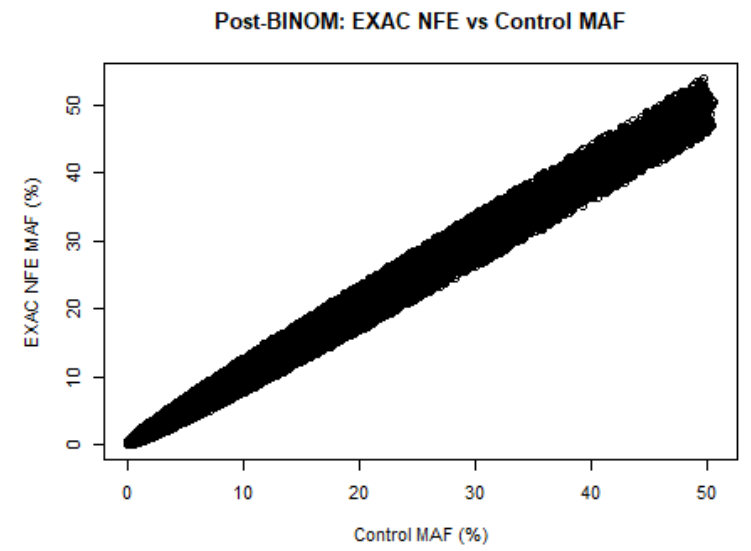

Supplementary Figure 4

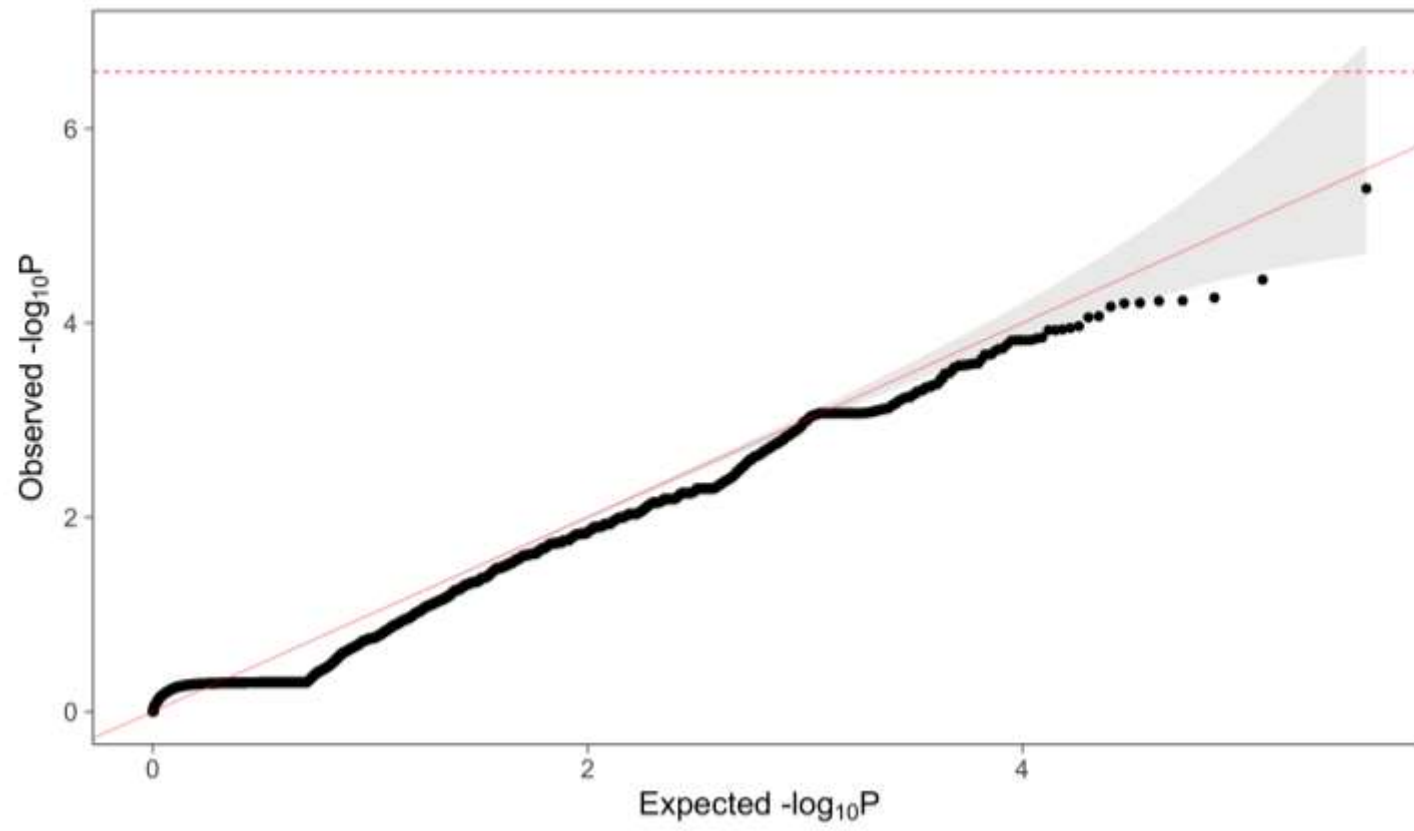

Supplement: 41598_2023_38984_MOESM1_ESM.pdf [file 41598_2023_38984_MOESM1_ESM.pdf]
